# Supplementary material
Source: PubMed Central journal article supplement (PMC4502593)
Supplement: NIHMS652081-supplement.pdf [file NIHMS652081-supplement.pdf]

**Supplementary Table 1: In vitro and in vivo DNA-PK phosphorylation sites in NHEJ proteins.**

The table lists several DNA-PKcs substrates that are NHEJ proteins, focusing primarily on work from the authors laboratory but is not an exhaustive list of DNA-PK substrates. The phosphorylated and adjacent amino acid in each amino acid sequences are indicated in bold face.

| Substrate | In vitro DNA-PK phosphorylation sites |                                                                                            |                                                                 | In vivo phosphorylation<br>(conditions and kinase, where known)                                                                                                     |
|-----------|---------------------------------------|--------------------------------------------------------------------------------------------|-----------------------------------------------------------------|---------------------------------------------------------------------------------------------------------------------------------------------------------------------|
|           | Phosphorylated residue                | SQ/TQ site                                                                                 | Non-SQ/TQ site                                                  |                                                                                                                                                                     |
| Artemis   | Thr-91                                | IETPT <b>Q</b> ISLV<br>(Ma et al., 2005)                                                   |                                                                 |                                                                                                                                                                     |
|           | Thr-251                               | TDRNT <b>Q</b> IHAC<br>(Ma et al., 2005)                                                   |                                                                 |                                                                                                                                                                     |
|           | Ser-362                               | LCRSS <b>SQ</b> STEP<br>(Ma et al., 2005)                                                  |                                                                 |                                                                                                                                                                     |
|           | Ser-385                               |                                                                                            | VHRD <b>S</b> EEEDD<br>(Ma et al., 2005)                        |                                                                                                                                                                     |
|           | Thr-410                               |                                                                                            | PYPETF <b>H</b> PEV<br>(Ma et al., 2005)                        |                                                                                                                                                                     |
|           | Ser-417 or 419                        |                                                                                            | PEVFS <b>M</b> TAVS<br>(Ma et al., 2005)                        |                                                                                                                                                                     |
|           | Ser-503                               |                                                                                            | ITDES <b>L</b> ENFP<br>(Goodarzi et al., 2006; Ma et al., 2005) |                                                                                                                                                                     |
|           | Ser-509/Ser-510/Thr-511               |                                                                                            | ENFP <b>S</b> STVAG<br>G (Ma et al., 2005)                      |                                                                                                                                                                     |
|           | Ser-516                               | VAGGS <b>SQ</b> SPKL<br>(Goodarzi et al., 2006; Ma et al., 2005; Soubeyrand et al., 2006). |                                                                 | ATM dependent after low doses of IR (Geng et al., 2007). DNA-PK dependent after high doses of IR (Geng et al., 2007) and after bleomycin (Soubeyrand et al., 2006). |
|           | Ser-518                               |                                                                                            | GG <b>SQ</b> SPKLFS<br>(Ma et al., 2005)                        |                                                                                                                                                                     |
|           | Ser-534                               | THISS <b>SQ</b> NSSQ<br>(Goodarzi et al., 2006; Ma et al., 2005)                           |                                                                 | ATM dependent after low doses of IR but DNA-PK dependent after high doses of IR (Geng et al., 2007).                                                                |
|           | Ser-538                               | SQ <b>NS</b> SQSTHI<br>(Goodarzi et al., 2006; Ma et al., 2005)                            |                                                                 | ATM dependent after low doses of IR but DNA-PK dependent after high doses of IR (Geng et al., 2007).                                                                |
|           | Ser-548                               | TEQGS <b>SQ</b> GWDS<br>(Goodarzi et al.,                                                  |                                                                 |                                                                                                                                                                     |

*Jette and Lees-Miller: DNA-PKcs in DSB repair and mitosis*

|                      |                 |                                                                                                               |                                            |                                                                                                                                                                                                                                               |
|----------------------|-----------------|---------------------------------------------------------------------------------------------------------------|--------------------------------------------|-----------------------------------------------------------------------------------------------------------------------------------------------------------------------------------------------------------------------------------------------|
|                      |                 | 2006; Ma et al., 2005)                                                                                        |                                            |                                                                                                                                                                                                                                               |
|                      | Ser-553         | QGWDS <b>SQ</b> SDTV<br>(Goodarzi et al., 2006; Ma et al., 2005)                                              |                                            |                                                                                                                                                                                                                                               |
|                      | Ser-562         | VLVSS <b>SQ</b> ERN<br>(Goodarzi et al., 2006)                                                                |                                            |                                                                                                                                                                                                                                               |
|                      | Ser-572         |                                                                                                               | GDIT <b>S</b> LDKAD<br>(Ma et al., 2005)   |                                                                                                                                                                                                                                               |
|                      | Ser-589         |                                                                                                               | NIPAS <b>L</b> MEQN<br>(Ma et al., 2005)   |                                                                                                                                                                                                                                               |
|                      | Thr-601         |                                                                                                               | CPKDT <b>Y</b> SDIK<br>(Ma et al., 2005)   |                                                                                                                                                                                                                                               |
|                      | Ser-645         | TNAD <b>SQ</b> SSSD<br>(Chen et al., 2005b; Goodarzi et al., 2006; Ma et al., 2002; Soubeyrand et al., 2006). |                                            | ATM dependent after low doses of IR (Chen et al., 2005b; Geng et al., 2007; Goodarzi et al., 2006). DNA-PK involved at high doses of IR (Geng et al., 2007).                                                                                  |
|                      | Ser-655/Thr-656 |                                                                                                               | FEVP <b>S</b> TPEAEL<br>(Ma et al., 2005)  |                                                                                                                                                                                                                                               |
|                      | Thr-676         |                                                                                                               | EKLAT <b>G</b> ESLA<br>(Ma et al., 2005)   |                                                                                                                                                                                                                                               |
|                      | Ser-679         |                                                                                                               | ATG <b>E</b> SIAVKK<br>(Ma et al., 2005)   |                                                                                                                                                                                                                                               |
|                      | Ser-688         |                                                                                                               | KRK <b>C</b> SLLDT<br>(Ma et al., 2005)    |                                                                                                                                                                                                                                               |
|                      | Thr-692         |                                                                                                               | SLL <b>D</b> T<br>(Ma et al., 2005)        |                                                                                                                                                                                                                                               |
|                      |                 |                                                                                                               |                                            |                                                                                                                                                                                                                                               |
| <b>DNA ligase IV</b> | Thr-650         |                                                                                                               | APNL <b>T</b> NVNKI<br>(Wang et al., 2004) |                                                                                                                                                                                                                                               |
|                      |                 |                                                                                                               |                                            |                                                                                                                                                                                                                                               |
| <b>DNA-PKcs</b>      | Ser-2023        |                                                                                                               | SDG <b>P</b> SYMSSL<br>(Cui et al., 2005)  |                                                                                                                                                                                                                                               |
|                      | Ser-2029        |                                                                                                               | MSSL <b>S</b> YLADS<br>(Cui et al., 2005)  |                                                                                                                                                                                                                                               |
|                      | Ser-2041        | SEEM <b>SQ</b> FDFS<br>(Cui et al., 2005)                                                                     |                                            |                                                                                                                                                                                                                                               |
|                      | Ser-2053        |                                                                                                               | YQ <b>S</b> YSYSSQD<br>(Cui et al., 2005)  |                                                                                                                                                                                                                                               |
|                      | Ser-2056        | YSY <b>SQ</b> DPRP<br>(Cui et al., 2005)                                                                      |                                            | DNA-PK dependent after DNA damage (Chen et al., 2005a; Meek et al., 2007) and mitosis (Douglas et al., 2014; Lee et al., 2011)                                                                                                                |
|                      | Thr-2609        | MFV <b>E</b> TQASQG<br>(Douglas et al., 2002)<br>(Chan et al., 2002)                                          |                                            | Okadaic acid induced (Douglas et al., 2002). IR induced (Douglas et al., 2007); IR induced, inhibited by NU7441 (Meek et al., 2007); DNA-PK dependent after IR (Chan et al., 2002); ATM dependent after IR (Chen et al., 2007); ATR dependent |

*Jette and Lees-Miller: DNA-PKcs in DSB repair and mitosis*

|               |          |                                                                        |                                                    |                                                                                                                                                                                                                                                                             |
|---------------|----------|------------------------------------------------------------------------|----------------------------------------------------|-----------------------------------------------------------------------------------------------------------------------------------------------------------------------------------------------------------------------------------------------------------------------------|
|               |          |                                                                        |                                                    | after UV radiation (Yajima et al., 2009); DNA-PK dependent in mitosis (Douglas et al., 2014; Lee et al., 2011).                                                                                                                                                             |
|               | Ser-2612 | ETQASQ <sup>S</sup> QTLQ<br>(Douglas et al., 2002)                     |                                                    | Okadaic acid induced (Douglas et al., 2002); IR induced (Douglas et al., 2007); IR induced, inhibited by NU7441 (Meek et al., 2007).                                                                                                                                        |
|               | Thr-2620 | LQTRTQ <sup>E</sup> EGSL<br>(Douglas et al., 2002)                     |                                                    | IR induced (Douglas et al., 2007); IR induced, inhibited by NU7441 (Meek et al., 2007); DNA-PK dependent in mitosis (Douglas et al., 2014; Lee et al., 2011; Shang et al., 2010)                                                                                            |
|               | Ser-2624 |                                                                        | TQEGSLSARW<br>(Douglas et al., 2002)               | IR induced (Douglas et al., 2007). IR induced, inhibited by NU7441 (Meek et al., 2007).                                                                                                                                                                                     |
|               | Thr-2638 | QIRATQ <sup>Q</sup> QHD<br>(Chen et al., 2007; Douglas et al., 2002).  |                                                    | Okadaic acid induced (Douglas et al., 2002); IR induced (Douglas et al., 2007); IR induced, inhibited by NU7441 (Meek et al., 2007)<br>ATM dependent after IR (Chen et al., 2007); DNA-PK dependent in mitosis (Douglas et al., 2014; Lee et al., 2011; Shang et al., 2010) |
|               | Thr-2647 | DFTLTQ <sup>T</sup> TADG<br>(Chen et al., 2007; Douglas et al., 2002). |                                                    | Okadaic acid induced (Douglas et al., 2002); IR induced (Douglas et al., 2007); IR induced, inhibited by NU7441 (Meek et al., 2007)<br>ATM dependent after IR (Chen et al., 2007). DNA-PK dependent in mitosis (Lee et al., 2011; Shang et al., 2010).                      |
|               | Ser-3205 |                                                                        | PEDNSM <sup>N</sup> NVDQ<br>(Douglas et al., 2002) | ATM-dependent after DNA damage (Neal et al., 2011) and PLK1-dependent in mitosis (Douglas et al., 2014).                                                                                                                                                                    |
|               | Ser-3821 | LNTMSQ <sup>E</sup> EKA<br>(Ma et al., 2005)                           |                                                    |                                                                                                                                                                                                                                                                             |
|               | Thr-3950 | FGSATQ <sup>F</sup> FLPV<br>(Douglas et al., 2007; Meek et al., 2007)  |                                                    | IR induced (Douglas et al., 2007). IR induced, inhibited by NU7441 (Meek et al., 2007); DNA-PK dependent in mitosis (Douglas et al., 2014).                                                                                                                                 |
|               | Ser-4026 |                                                                        | KKGG <sup>S</sup> SWIQEI<br>(Ma et al., 2005)      |                                                                                                                                                                                                                                                                             |
|               | Thr-4102 | LSEETQ <sup>V</sup> VKCL<br>(Ma et al., 2005)                          |                                                    |                                                                                                                                                                                                                                                                             |
|               |          |                                                                        |                                                    |                                                                                                                                                                                                                                                                             |
| <b>GOLPH3</b> | Thr-143  | GDKETQ <sup>P</sup> PET<br>(Farber-Katz et al., 2014)                  |                                                    | IR, bleomycin and doxorubicin dependent, inhibited by NU7441 (Farber-Katz et al., 2014)                                                                                                                                                                                     |
|               | Thr-148  |                                                                        | QPPETV <sup>Q</sup> NWI                            | IR, bleomycin and doxorubicin                                                                                                                                                                                                                                               |

*Jette and Lees-Miller: DNA-PKcs in DSB repair and mitosis*

|                     |         |                                                                                                            |                                                              |                                                                                                                                      |
|---------------------|---------|------------------------------------------------------------------------------------------------------------|--------------------------------------------------------------|--------------------------------------------------------------------------------------------------------------------------------------|
|                     |         |                                                                                                            | (Farber-Katz et al., 2014)                                   | dependent, inhibited by NU7441 (Farber-Katz et al., 2014)                                                                            |
| <b>Hsp90-alpha</b>  | Thr5    | MPEETQTQPQ (Lees-Miller and Anderson 1989)                                                                 |                                                              |                                                                                                                                      |
|                     | Thr-7   | EETQTQPQPM (Lees-Miller and Anderson 1989)                                                                 |                                                              | DNA-PK dependent after DNA damage (Quanz et al., 2012).                                                                              |
| <b>Ku70</b>         | Ser -6  |                                                                                                            | SGWESYYKTE (Chan et al., 1999)                               | Okadaic acid induced (Douglas et al., 2005).                                                                                         |
| <b>Ku80</b>         | Ser-577 |                                                                                                            | GAHFSVSSLA (Chan et al., 1999)                               | Okadaic acid induced (Douglas et al., 2005).                                                                                         |
|                     | Ser-580 |                                                                                                            | FSVSSLAEGS (Chan et al., 1999)                               | Okadaic acid induced (Douglas et al., 2005).                                                                                         |
|                     | Thr-715 |                                                                                                            | PSGDTAAVFE (Chan et al., 1999)                               | Okadaic acid induced (Douglas et al., 2005).                                                                                         |
| <b>P53</b>          | Ser-15  | EPPLSQETFS (Lees-Miller et al., 1992)                                                                      |                                                              | ATM-dependent after DNA damage (Siliciano et al., 1997).                                                                             |
|                     | Ser-37  | SPLPSQAMDD (Lees-Miller et al., 1992)                                                                      |                                                              |                                                                                                                                      |
| <b>PNKP</b>         | Ser-114 | RTPE <span style="background-color: #cccccc;">SQ</span> PDTP (Segal-Raz et al., 2011; Zolner et al., 2011) |                                                              | ATM-dependent after IR (Segal-Raz et al., 2011; Zolner et al., 2011).                                                                |
|                     | Ser-126 | TPLV <span style="background-color: #cccccc;">SQ</span> DEKR (Segal-Raz et al., 2011; Zolner et al., 2011) |                                                              | ATM and DNA-PK-dependent after IR (Segal-Raz et al., 2011; Zolner et al., 2011).                                                     |
| <b>SAF-A/hnRNPU</b> | Ser-59  |                                                                                                            | PGNGSLDLGG (Berglund and Clarke, 2009; Britton et al., 2009) | DNA-PK-dependent after calicheamicin and (in DNA ligase-deficient cells) after IR (Berglund and Clarke, 2009; Britton et al., 2009). |
| <b>XRCC4</b>        | Ser-260 |                                                                                                            | SISSLDVTD (Lee et al., 2004; Yu et al., 2003)                |                                                                                                                                      |
|                     | Thr-318 |                                                                                                            | AENMSLETLR (Lee et al., 2003)                                | IR induced (Yu and Lees-Miller, unpublished).                                                                                        |

*Jette and Lees-Miller: DNA-PKcs in DSB repair and mitosis*

|            |         |                                       |                                                     |                                                                                                            |
|------------|---------|---------------------------------------|-----------------------------------------------------|------------------------------------------------------------------------------------------------------------|
|            |         |                                       | 2004; Yu et al., 2003)                              |                                                                                                            |
| <b>XLF</b> | Ser-245 |                                       | SNSAS <b>L</b> QGID (Yu et al., 2008)               | DNA-PK-dependent after IR (Yu et al., 2008)                                                                |
|            | Ser-251 | QGID <b>S</b> QCVNQ (Yu et al., 2008) |                                                     | ATM-dependent after IR (Yu et al., 2008)                                                                   |
| <b>WRN</b> | Ser-440 |                                       | YVIE <b>S</b> DEDLE (Kusumoto-Matsuo et al., 2014). | DNA-PK-dependent following bleomycin treatment using NU7026 and wortmannin (Kusumoto-Matsuo et al., 2014). |
|            | Ser-467 |                                       | YVIE <b>S</b> DEDLE (Kusumoto-Matsuo et al., 2014). | DNA-PK-dependent following bleomycin treatment using NU7026 and wortmannin (Kusumoto-Matsuo et al., 2014). |
|            |         |                                       |                                                     |                                                                                                            |

**References for Supplementary Table 1**

- Berglund, F.M. and Clarke, P.R., 2009. hnRNP-U is a specific DNA-dependent protein kinase substrate phosphorylated in response to DNA double-strand breaks, *Biochem Biophys Res Commun.* 381, 59-64.
- Britton, S., Froment, C., Frit, P., Monsarrat, B., Salles, B. and Calsou, P., 2009. Cell nonhomologous end joining capacity controls SAF-A phosphorylation by DNA-PK in response to DNA double-strand breaks inducers, *Cell Cycle.* 8, 3717-22.
- Chan, D.W., Chen, B.P., Prithivirajasingh, S., Kurimasa, A., Story, M.D., Qin, J. and Chen, D.J., 2002. Autophosphorylation of the DNA-dependent protein kinase catalytic subunit is required for rejoining of DNA double-strand breaks, *Genes Dev.* 16, 2333-8.
- Chan, D.W., Ye, R., Veillette, C.J. and Lees-Miller, S.P., 1999. DNA-dependent protein kinase phosphorylation sites in Ku 70/80 heterodimer, *Biochemistry.* 38, 1819-28.
- Chen, B.P., Chan, D.W., Kobayashi, J., Burma, S., Asaithamby, A., Morotomi-Yano, K., Botvinick, E., Qin, J. and Chen, D.J., 2005a. Cell cycle dependence of DNA-dependent protein kinase phosphorylation in response to DNA double strand breaks, *J Biol Chem.* 280, 14709-15.
- Chen, B.P., Uematsu, N., Kobayashi, J., Lerenthal, Y., Krempler, A., Yajima, H., Loblrich, M., Shiloh, Y. and Chen, D.J., 2007. Ataxia telangiectasia mutated (ATM) is essential for DNA-PKcs phosphorylations at the Thr-2609 cluster upon DNA double strand break, *J Biol Chem.* 282, 6582-7.
- Chen, L., Morio, T., Minegishi, Y., Nakada, S., Nagasawa, M., Komatsu, K., Chessa, L., Villa, A., Lecis, D., Delia, D. and Mizutani, S., 2005b. Ataxia-telangiectasia-mutated dependent phosphorylation of Artemis in response to DNA damage, *Cancer Sci.* 96, 134-41.
- Cui, X., Yu, Y., Gupta, S., Cho, Y.M., Lees-Miller, S.P. and Meek, K., 2005. Autophosphorylation of DNA-dependent protein kinase regulates DNA end processing and may also alter double-strand break repair pathway choice, *Mol Cell Biol.* 25, 10842-52.
- Douglas, P., Cui, X., Block, W.D., Yu, Y., Gupta, S., Ding, Q., Ye, R., Morrice, N., Lees-Miller, S.P. and Meek, K., 2007. The DNA-dependent protein kinase catalytic subunit is phosphorylated in vivo on threonine 3950, a highly conserved amino acid in the protein kinase domain, *Mol Cell Biol.* 27, 1581-91.
- Douglas, P., Gupta, S., Morrice, N., Meek, K. and Lees-Miller, S.P., 2005. DNA-PK-dependent phosphorylation of Ku70/80 is not required for non-homologous end joining, *DNA Repair (Amst).* 4, 1006-18.
- Douglas, P., Sapkota, G.P., Morrice, N., Yu, Y., Goodarzi, A.A., Merkle, D., Meek, K., Alessi, D.R. and Lees-Miller, S.P., 2002. Identification of in vitro and in vivo phosphorylation sites in the catalytic subunit of the DNA-dependent protein kinase, *Biochem J.* 368, 243-51.
- Douglas, P., Ye, R., Trinkle-Mulcahy, L., Neal, J.A., De Wever, V., Morrice, N.A., Meek, K. and Lees-Miller, S.P., 2014. Polo-like kinase 1 (PLK1) and protein phosphatase 6 (PP6) regulate DNA-dependent protein kinase catalytic subunit (DNA-PKcs) phosphorylation in mitosis, *Biosci Rep.*
- Farber-Katz, S.E., Dippold, H.C., Buschman, M.D., Peterman, M.C., Xing, M., Noakes, C.J., Tat, J., Ng, M.M., Rahajeng, J., Cowan, D.M., Fuchs, G.J., Zhou, H. and Field, S.J., 2014. DNA damage triggers Golgi dispersal via DNA-PK and GOLPH3, *Cell.* 156, 413-27.
- Geng, L., Zhang, X., Zheng, S. and Legerski, R.J., 2007. Artemis links ATM to G2/M checkpoint recovery via regulation of Cdk1-cyclin B, *Mol Cell Biol.* 27, 2625-35.
- Goodarzi, A.A., Yu, Y., Riballo, E., Douglas, P., Walker, S.A., Ye, R., Harer, C., Marchetti, C., Morrice, N., Jeggo, P.A. and Lees-Miller, S.P., 2006. DNA-PK autophosphorylation facilitates Artemis endonuclease activity, *EMBO J.* 25, 3880-9.
- Kusumoto-Matsuo, R., Ghosh, D., Karmakar, P., May, A., Ramsden, D. and Bohr, V.A., 2014. Serines 440 and 467 in the Werner syndrome protein are phosphorylated by DNA-PK and affects its dynamics in response to DNA double strand breaks, *Aging (Albany NY).* 6, 70-81.
- Lee, K.J., Jovanovic, M., Udayakumar, D., Bladen, C.L. and Dynan, W.S., 2004. Identification of DNA-PKcs phosphorylation sites in XRCC4 and effects of mutations at these sites on DNA end joining in a cell-free system, *DNA Repair (Amst).* 3, 267-76.

- Lee, K.J., Lin, Y.F., Chou, H.Y., Yajima, H., Fattah, K.R., Lee, S.C. and Chen, B.P., 2011. Involvement of DNA-dependent protein kinase in normal cell cycle progression through mitosis, *J Biol Chem.* 286, 12796-802.
- Lees-Miller, S.P., Sakaguchi, K., Ullrich, S.J., Appella, E. and Anderson, C.W., 1992. Human DNA-activated protein kinase phosphorylates serines 15 and 37 in the amino-terminal transactivation domain of human p53, *Mol Cell Biol.* 12, 5041-9.
- Ma, Y., Pannicke, U., Lu, H., Niewolik, D., Schwarz, K. and Lieber, M.R., 2005. The DNA-dependent protein kinase catalytic subunit phosphorylation sites in human Artemis, *J Biol Chem.* 280, 33839-46.
- Ma, Y., Pannicke, U., Schwarz, K. and Lieber, M.R., 2002. Hairpin opening and overhang processing by an Artemis/DNA-dependent protein kinase complex in nonhomologous end joining and V(D)J recombination, *Cell.* 108, 781-94.
- Meek, K., Douglas, P., Cui, X., Ding, Q. and Lees-Miller, S.P., 2007. trans Autophosphorylation at DNA-dependent protein kinase's two major autophosphorylation site clusters facilitates end processing but not end joining, *Mol Cell Biol.* 27, 3881-90.
- Neal, J.A., Dang, V., Douglas, P., Wold, M.S., Lees-Miller, S.P. and Meek, K., 2011. Inhibition of homologous recombination by DNA-dependent protein kinase requires kinase activity, is titratable, and is modulated by autophosphorylation, *Mol Cell Biol.* 31, 1719-33.
- Quanz, M., Herbertte, A., Sayarath, M., de Koning, L., Dubois, T., Sun, J.S. and Dutreix, M., 2012. Heat shock protein 90alpha (Hsp90alpha) is phosphorylated in response to DNA damage and accumulates in repair foci, *J Biol Chem.* 287, 8803-15.
- Segal-Raz, H., Mass, G., Baranes-Bachar, K., Lerenthal, Y., Wang, S.Y., Chung, Y.M., Ziv-Lehrman, S., Strom, C.E., Helleday, T., Hu, M.C., Chen, D.J. and Shiloh, Y., 2011. ATM-mediated phosphorylation of polynucleotide kinase/phosphatase is required for effective DNA double-strand break repair, *EMBO Rep.* 12, 713-9.
- Shang, Z.F., Huang, B., Xu, Q.Z., Zhang, S.M., Fan, R., Liu, X.D., Wang, Y. and Zhou, P.K., 2010. Inactivation of DNA-dependent protein kinase leads to spindle disruption and mitotic catastrophe with attenuated checkpoint protein 2 Phosphorylation in response to DNA damage, *Cancer Res.* 70, 3657-66.
- Siliciano, J.D., Canman, C.E., Taya, Y., Sakaguchi, K., Appella, E. and Kastan, M.B., 1997. DNA damage induces phosphorylation of the amino terminus of p53, *Genes Dev.* 11, 3471-81.
- Soubeyrand, S., Pope, L., De Chasseval, R., Gosselin, D., Dong, F., de Villartay, J.P. and Hache, R.J., 2006. Artemis phosphorylated by DNA-dependent protein kinase associates preferentially with discrete regions of chromatin, *J Mol Biol.* 358, 1200-11.
- Wang, Y.G., Nnakwe, C., Lane, W.S., Modesti, M. and Frank, K.M., 2004. Phosphorylation and regulation of DNA ligase IV stability by DNA-dependent protein kinase, *J Biol Chem.* 279, 37282-90.
- Yajima, H., Lee, K.J., Zhang, S., Kobayashi, J. and Chen, B.P., 2009. DNA double-strand break formation upon UV-induced replication stress activates ATM and DNA-PKcs kinases, *J Mol Biol.* 385, 800-10.
- Yu, Y., Mahaney, B.L., Yano, K., Ye, R., Fang, S., Douglas, P., Chen, D.J. and Lees-Miller, S.P., 2008. DNA-PK and ATM phosphorylation sites in XLF/Cernunnos are not required for repair of DNA double strand breaks, *DNA Repair (Amst).* 7, 1680-92.
- Yu, Y., Wang, W., Ding, Q., Ye, R., Chen, D., Merkle, D., Schriemer, D., Meek, K. and Lees-Miller, S.P., 2003. DNA-PK phosphorylation sites in XRCC4 are not required for survival after radiation or for V(D)J recombination, *DNA Repair (Amst).* 2, 1239-52.
- Zolner, A.E., Abdou, I., Ye, R., Mani, R.S., Fanta, M., Yu, Y., Douglas, P., Tahbaz, N., Fang, S., Dobbs, T., Wang, C., Morrice, N., Hendzel, M.J., Weinfeld, M. and Lees-Miller, S.P., 2011. Phosphorylation of polynucleotide kinase/ phosphatase by DNA-dependent protein kinase and ataxia-telangiectasia mutated regulates its association with sites of DNA damage, *Nucleic Acids Res.* 39, 9224-37.
